# Supplementary material for: Drought Offsets the Controls on Colored Dissolved Organic Matter in Lakes
Source: MDPI journal article supplement (doi:10.3390/rs16081345), 2024-04-11
Supplement: s1 [file s1]

## Supplementary Files for Online Publication Only

### Drought Offsets the Controls on Colored Dissolved Organic Matter in Lakes

**Enass Said. Al-Kharusi<sup>1</sup>, Geert Hensgens<sup>1</sup>, Abdulhakim M. Abdi<sup>2</sup>, Tiit Kutser<sup>3</sup>, Jan Karlsson<sup>4</sup>, David E. Tenenbaum<sup>1</sup>, Martin Berggren<sup>1\*</sup>**

<sup>1</sup> Department of Physical Geography and Ecosystem Science, Lund University, Sölvegatan 12, 22362 Lund, Sweden

<sup>2</sup> Center for Environmental and Climate Research, Lund University, Sölvegatan 37, 22362 Lund, Sweden

<sup>3</sup> Estonian Marine Institute, University of Tartu, Mäealuse 14, 12618 Tallinn, Estonia

<sup>4</sup> Climate Impacts Research Centre (CIRC), Department of Ecology and Environmental Science, Linnaeusväg 6, 90187 Umeå, Sweden

\*Correspondence: martin.berggren@nateko.lu.se

## Contents

**Table S1. Percentage of land cover in the cumulative area of the study catchments**

**Table S2. Resolution, radiometry and signal-to-noise ratio (SNR) of Sentinel-2 bands**

**Table S3. Variation partitioning sub-datasets**

**Figure S1. The spatial coefficient of variation (SCV) of temperature and lake area**

**Table S1. Percentage of land cover in the cumulative area of the study catchments**, shown as mean proportions in the CORINE land cover datasets from 2012 and 2018, respectively.

| Land cover                       |       |
|----------------------------------|-------|
| Mixed forest                     | 7.4%  |
| Broadleaf forest                 | 12.3% |
| Coniferous forest                | 23.8% |
| Herbaceous vegetation and shrubs | 32.3% |
| Open area                        | 11.6% |
| Wetland                          | 8.0%  |
| Open water                       | 4.6%  |

**Table S2. Resolution, radiometry and signal-to-noise ratio (SNR) of Sentinel-2 bands.** The ratio between band 3 and band 4 was used to predict CDOM in this study.

| Band | Resolution<br>(m) | Central wavelength<br>(nm) | Region   | Bandwidth<br>(nm) | SNR |
|------|-------------------|----------------------------|----------|-------------------|-----|
| 2    | 10                | 490                        | Blue     | 65                | 154 |
| 3    | 10                | 560                        | Green    | 35                | 168 |
| 4    | 10                | 665                        | Red      | 30                | 142 |
| 5    | 20                | 705                        | Red-edge | 15                | 117 |
| 6    | 20                | 740                        | Red-edge | 15                | 89  |
| 7    | 10                | 783                        | Red-edge | 20                | 105 |
| 8    | 20                | 842                        | NIR      | 115               | 174 |

**Table S3. Variation partitioning sub-datasets.** Morphometry variables were determined according to Peters *et al.* (reference [30] in main paper).

| Climate Data  | Land Cover Data             | Landscape Morphometry |
|---------------|-----------------------------|-----------------------|
| Temperature   | Broad leaf                  | Lake area             |
| Precipitation | Coniferous forests          | Lake perimeter        |
| PDI           | Mixed forests               | Basin area            |
|               | Grasslands                  | Basin perimeter       |
|               | Moors and heathland         | Basin length          |
|               | Transitional woodland shrub | Basin width           |
|               | Bare rocks                  | Basin northness       |
|               | Sparsely vegetated          | Basin eastness        |
|               | Peat bogs                   | Basin cpar*           |
|               | Water bodies                | Basin hortons f1      |
|               | NDVI                        | Basin hortons f2      |
|               |                             | Basin schlumm         |
|               |                             | Basin chorley's       |
|               |                             | Mean elevation        |
|               |                             | Stdv elevation        |
|               |                             | Mean slope            |

\*Basin corrected perimeter to area ratio

## Supplementary figures

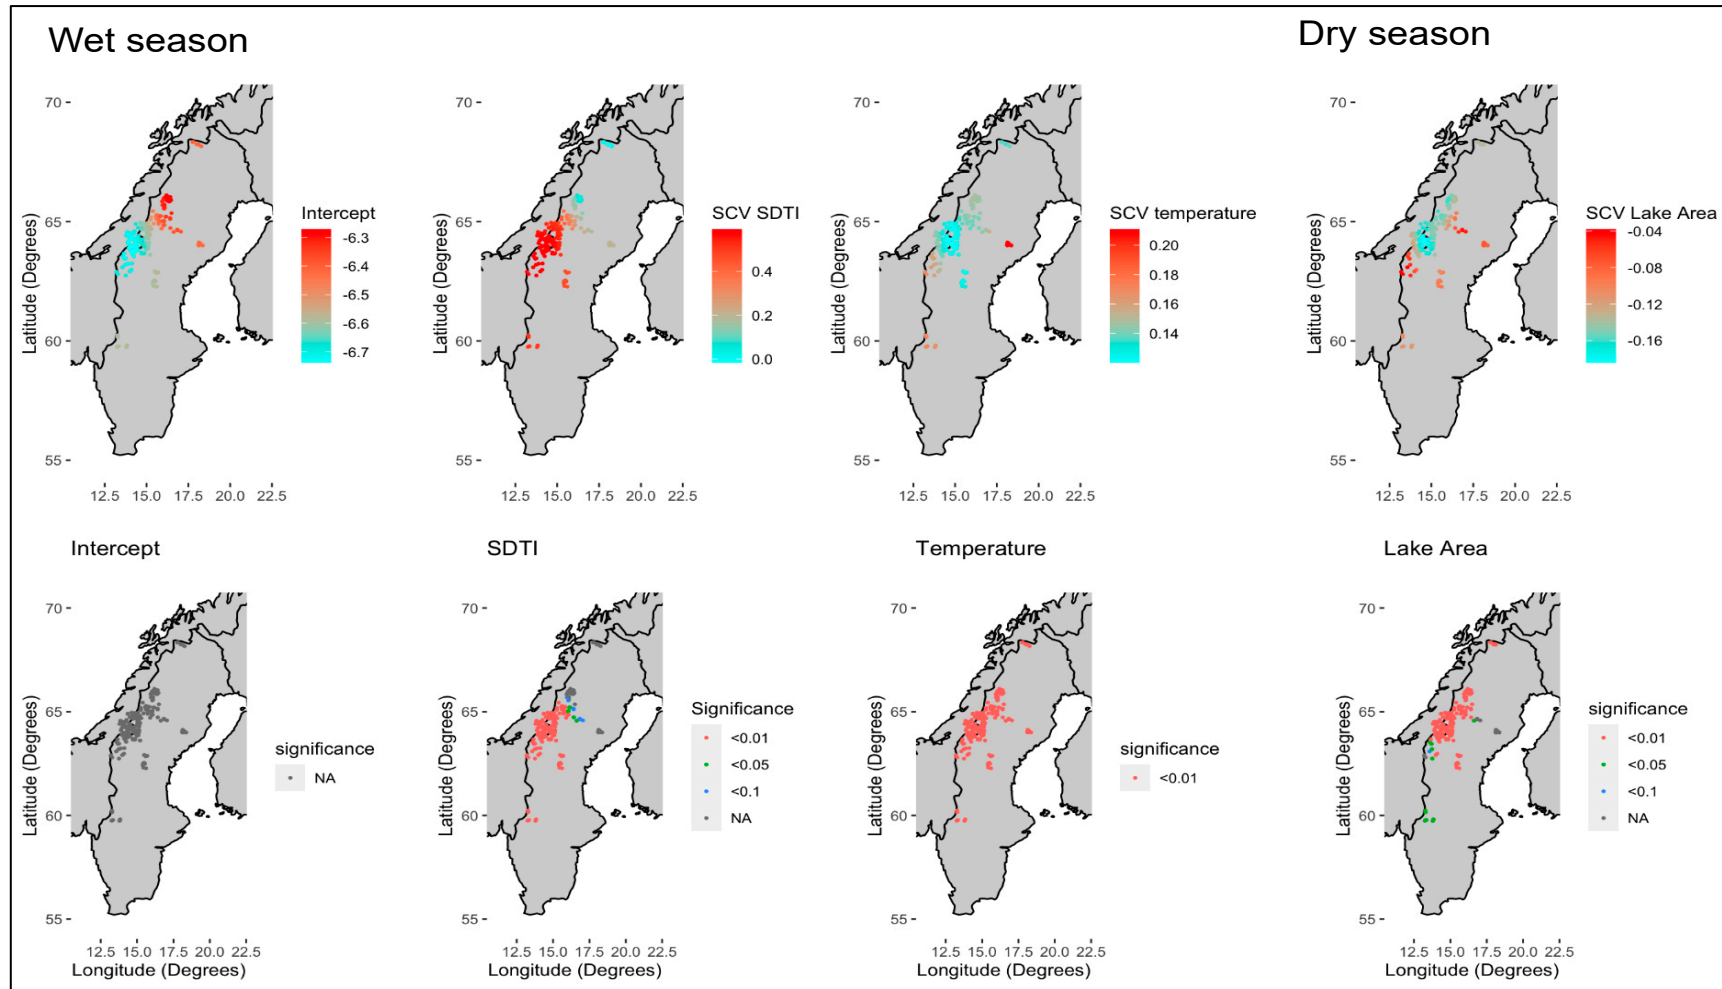

**Figure S1.** The spatial coefficient of variation (SCV) of temperature and lake area in wet (summer 2016) and dry (summer 2018) season and the significance of the spatial points of SCV.
